# Supplementary material for: Triarylborane substituted naphthalimide as a fluoride and cyanide ion sensor
Source: Royal Society of Chemistry journal article supplement (doi:10.1039/c5dt04039f), 2015-12-18
Supplement: c5dt04039f1.pdf [file c5dt04039f1.pdf]

Supporting Information

**Triarylborane substituted naphthalimide as fluoride and cyanide  
ion sensor**

**T. Sheshashena Reddy, Ramesh Maragani, Rajneesh Misra\***

Department of Chemistry, Indian Institute of Technology Indore, Indore-452017.

Table of Contents

|                                                                          |         |
|--------------------------------------------------------------------------|---------|
| 1. Experimental                                                          | S2-S3   |
| 2. Copies of $^1\text{H}$ , $^{13}\text{C}$ spectra and HRMS of <b>3</b> | S4-S5   |
| 3. Copy of TGA spectrum of <b>3</b>                                      | S6      |
| 4. Anion binding studies of <b>3</b>                                     | S6-S8   |
| 5. Aromatic proton assignment of <b>3</b>                                | S9      |
| 6. $^1\text{H}$ -NMR titration spectra of <b>3</b> with TBAF and TBACN.  | S9-S11  |
| 7. Orbital energy diagram of <b>3</b> and <b>3-F</b> and <b>3-CN</b>     | S12     |
| 8. DFT data                                                              | S12-S17 |

## Experimental:

All the chemicals were purchased from commercial sources and used without further purification. Triethylamine was received from commercial source, and distilled on KOH prior to use.  $^1\text{H}$  NMR and  $^{13}\text{C}$  NMR spectra were performed on 400 MHz and 100 MHz Bruker Ultra shield (Avance-III) Nano Bay spectrometer. All the spectra were recorded at 298K.  $^1\text{H}$  NMR data are reported as follows: s: singlet, d: doublet, t: triplet, bs: broad singlet and coupling constants,  $J$ , are given in Hz. Chemical shifts in  $^1\text{H}$  NMR and  $^{13}\text{C}$  NMR spectra were reported in parts per million (ppm) with TMS (0 ppm) and  $\text{CDCl}_3$  (77.00) as standards. TLC analysis was carried out using silica gel 60  $\text{F}_{254}$  plates. UV-vis absorption spectra of all compounds were recorded in THF on a carry-100 Bio UV-visible Spectrophotometer. Emission spectra were taken in a fluoromax-4p fluorimeter from Horibayovin (model: FM-100). The excitation and emission slits were 2/2 nm for the emission measurements. All the measurements were done at 298K. For UV-visi and fluorescence titrations the anion ( $\text{F}^-$ ,  $\text{Cl}^-$ ,  $\text{Br}^-$ ,  $\text{I}^-$ ,  $\text{NO}_2^-$  and  $\text{CN}^-$ ) stock solutions were prepared in THF in the order of  $10^{-3}\text{M}$ . The triarylborane naphthalimide **3** stock solution was prepared ( $\text{C}=1\text{mM}$ ) in THF. Working solutions of **3** and anions were freshly prepared from stock solutions. The fluorescence quantum yield ( $\Phi$ ) was calculated using Diphenylanthracene ( $\Phi=0.9$ ) as reference. Column chromatography was performed on Merck silica gel (230-400 mesh). The anions were used in their tetrabutylammonium salts. The relative fluorescence quantum efficiency, ( $\Phi$ ), is evaluated by employing 9,10-diphenyl anthracene as standard ( $\Phi =0.9$ ) following the equation 1.

$$\Phi = \Phi_{std} \left( \frac{I_{unk}}{I_{std}} \right) \left( \frac{A_{std}}{A_{unk}} \right) \left( \frac{\eta_{unk}}{\eta_{std}} \right)^2 \dots\dots\dots 1$$

Where  $\Phi_{unk}$ ,  $\Phi_{std}$ ,  $I_{unk}$ ,  $I_{std}$ ,  $A_{std}$ ,  $A_{unk}$ ,  $\eta_{unk}$  and  $\eta_{std}$  are the fluorescence quantum efficiency, the integral of the emission intensities, the absorbance at the excitation wavelength and the refractive indexes of the corresponding solvents of the unknown samples and the standard respectively.

The binding constant of the complex formed in solution has been estimated by using the standard Benesi-Hildebrand equation 2.

$$\frac{1}{I - I_0} = \frac{1}{I_1 - I_0} + \frac{1}{(I_1 - I_0)K_a[M]} \quad \text{Eq. 2}$$

Where  $I_0$  is the intensity before addition of anion,  $I$  is the intensity in the presence of  $F^-/CN^-$ ,  $I_1$  is intensity upon saturation with anion, and  $K_a$  is the association constant of the complex formed.

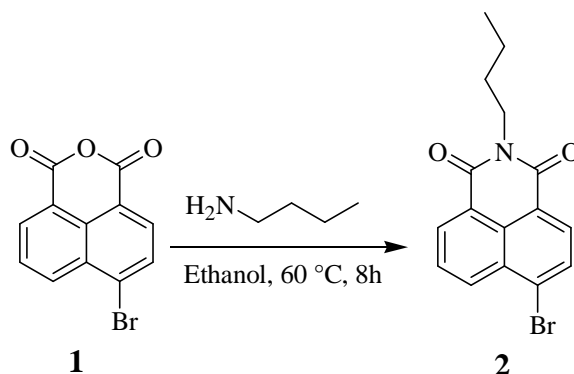

**Scheme S1:** Synthesis of 4-Bromonaphthalimide **2**

**Synthesis of 4-Bromonaphthalimide **2**:** 4-Bromo-1,8-naphthalimide (1 g, 3.62 mmol) was dissolved in 15 mL ethanol. Then n-butyl amine (0.29 g, 3.98 mmol) was added, and the mixture was stirred at 60°C for 8 h. The mixture was cooled to room temperature and evaporated in vacuum to obtain the residue. Then the residue was purified on silica gel column chromatography employing hexane: ethyl acetate (19:1, V/V) to provide **2**. Yield: 1.06 g, 88%.  $^1\text{H}$  NMR (400 MHz,  $\text{CDCl}_3$ ):  $\delta$  = 8.65 (d,  $J=6.52$ , 1H, aromatic), 8.55 (d,  $J=8.28$ , 1H, aromatic), 8.40 (d,  $J=7.78$ , 1H, aromatic), 8.03 (d,  $J=7.78$ , 1H, aromatic), 7.84 (t,  $J=7.52$ , 1H, aromatic), 4.16 (t,  $J=7.52$ , 2H,  $-\text{NCH}_2$ ), 1.74–1.67 (m, 2H,  $-\text{CH}_2$ ), 1.49–1.39 (m, 2H,  $-\text{CH}_2$ ), 0.97 (t,  $J=7.27$ , 3H,  $-\text{CH}_3$ ).  $^{13}\text{C}$  (100 MHz,  $\text{CDCl}_3$ ):  $\delta$  163.6, 163.6, 133.2, 132.0, 131.1, 131.0, 130.5, 130.1, 128.9, 128.0, 123.1, 122.2, 40.3, 30.1, 20.3, 13.8. Mass spectral data:  $m/z$  ( $\text{M}+\text{Na}$ ) = 354.01 ( $\text{M}+1$ ).

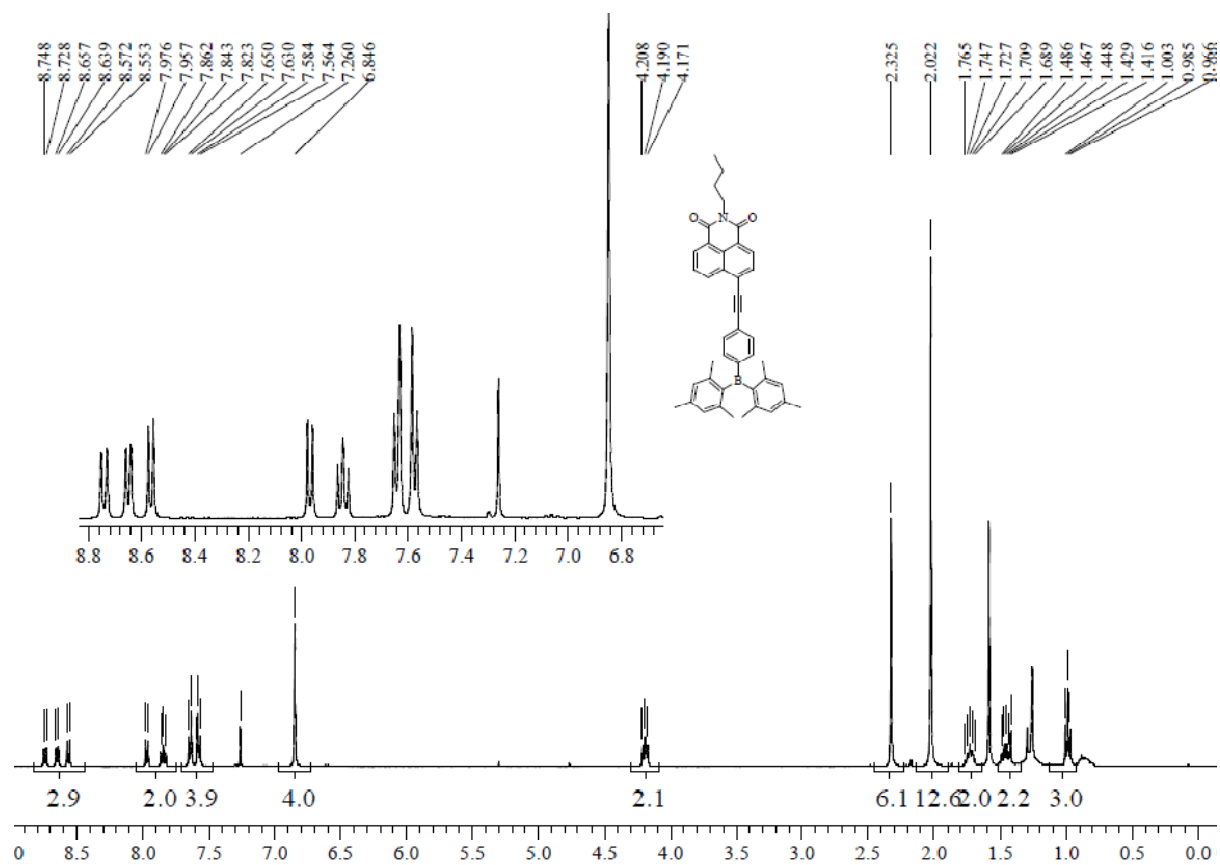

**Figure S1:**  $^1\text{H-NMR}$  spectrum of **3**

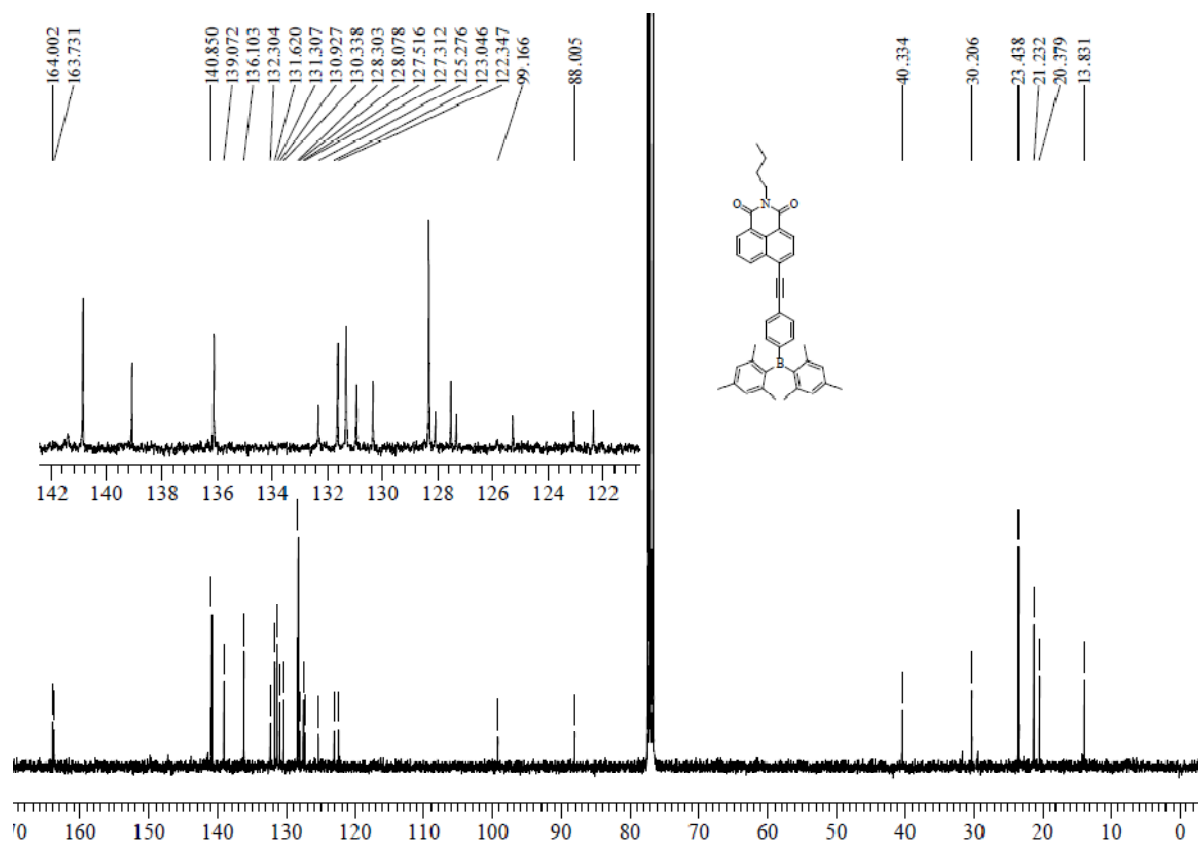

**Figure S2:** <sup>13</sup>C-NMR spectrum of **3**

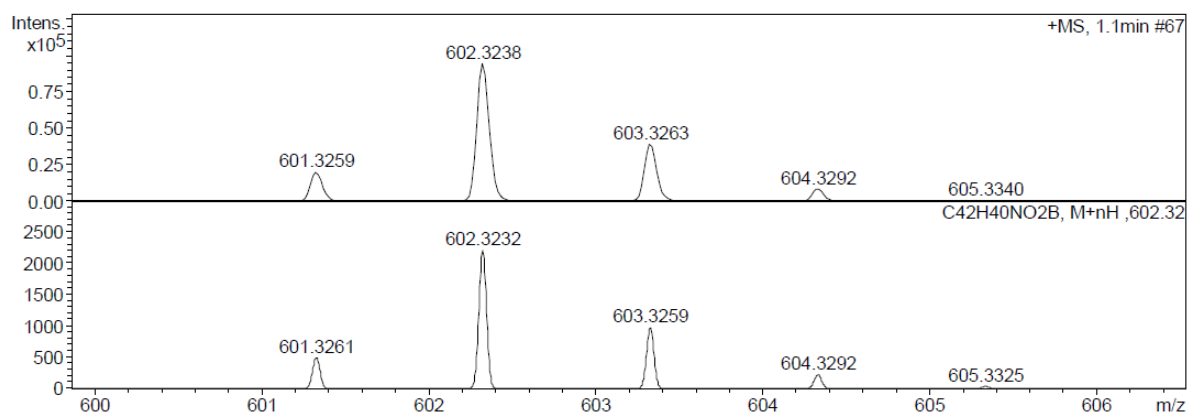

**Figure S3:** HRMS of **3**.

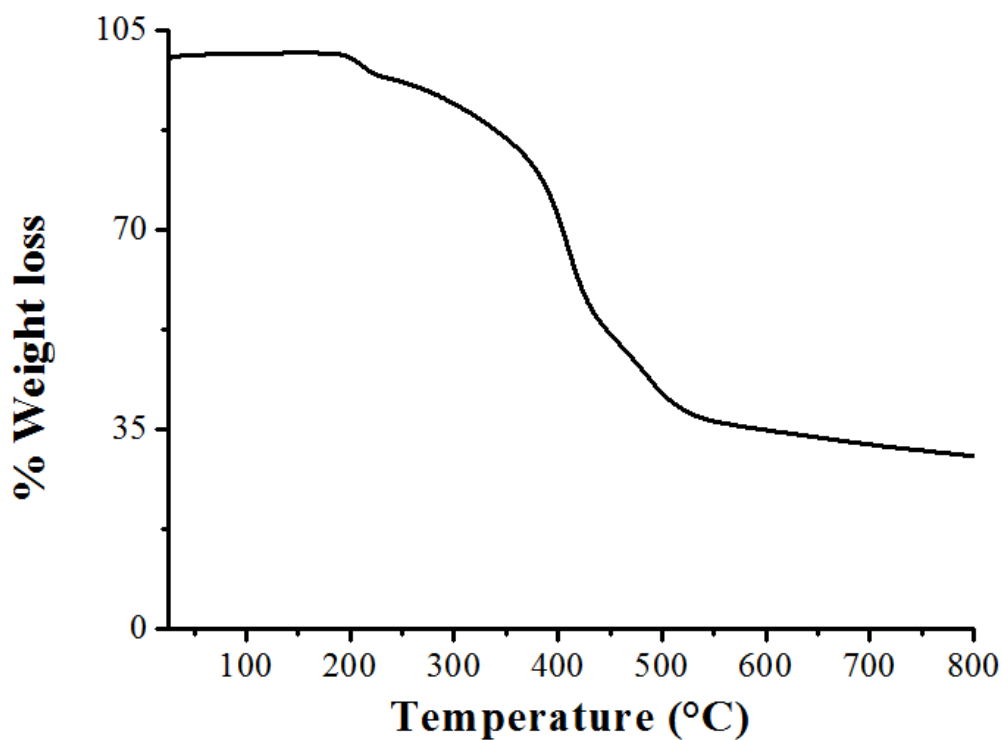

**Figure S4:** TGA plot of the **3**.

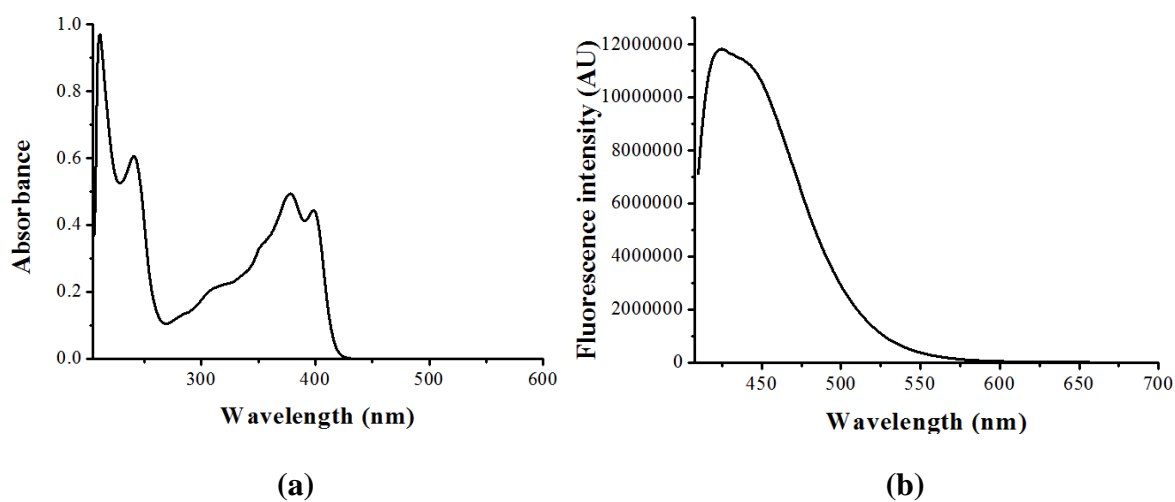

**Figure S5:** The absorption (a) and fluorescence spectra (b) of triarylborane naphthalimide **3** ( $1.66 \times 10^{-5}$  M) in THF solvent ( $\lambda_{\text{ex}}$  398 nm).

**Anion Binding Studies:**

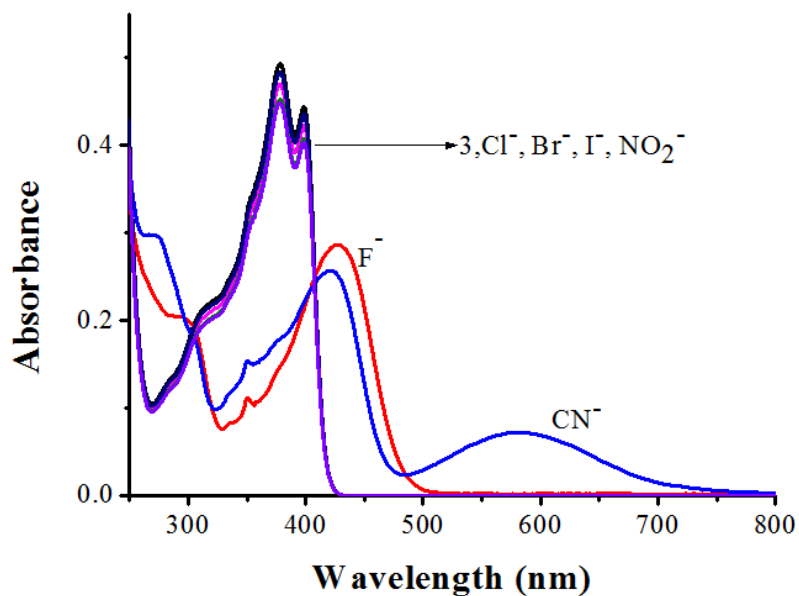

**Figure S6:** Effect of anions on the absorption spectrum of **3** (3.66 μM) in THF solvent.

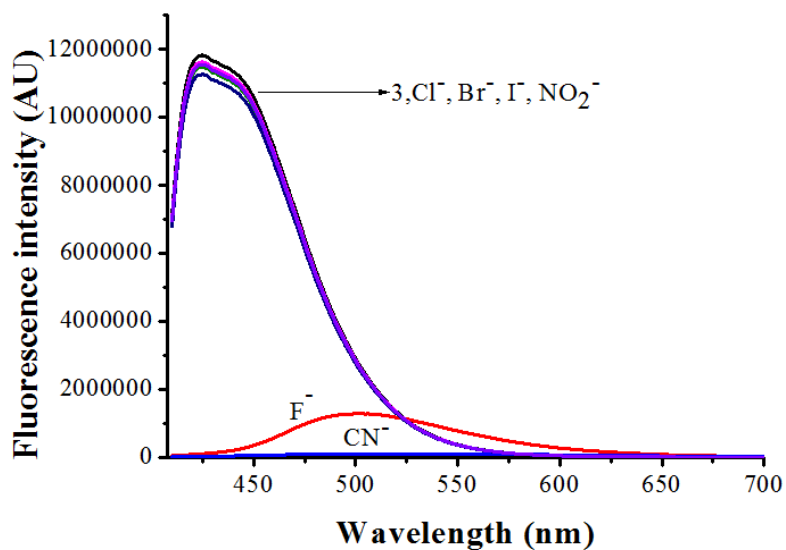

**Figure S7:** Effect of anions on the fluorescence spectrum of **3** (1.66 x 10<sup>-5</sup> M) (λ<sub>ex</sub> 398nm) in THF solvent.

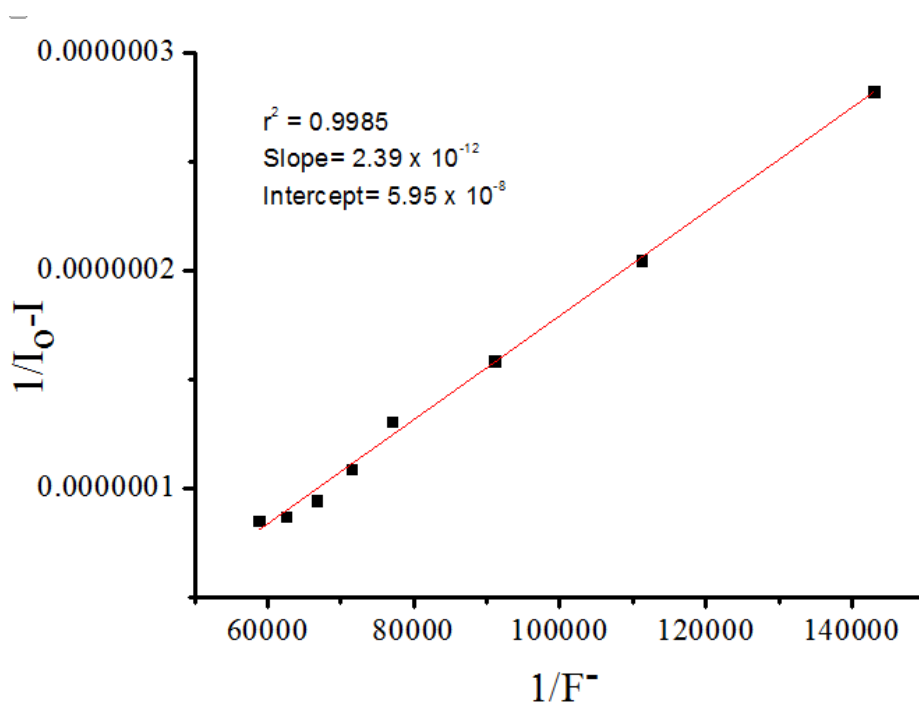

**Figure S8:** Benesi–Hildebrand plot of **3** by plotting  $1/(I_0-I)$  as a function of  $1/[F^-]$  for the calculation of binding constant (K). Here I refer to the fluorescence intensity of **3** at 424 nm at a given  $F^-$  concentration and  $I_0$  corresponds to the initial fluorescence intensity of **3** at 424 nm in the absence of  $F^-$ .

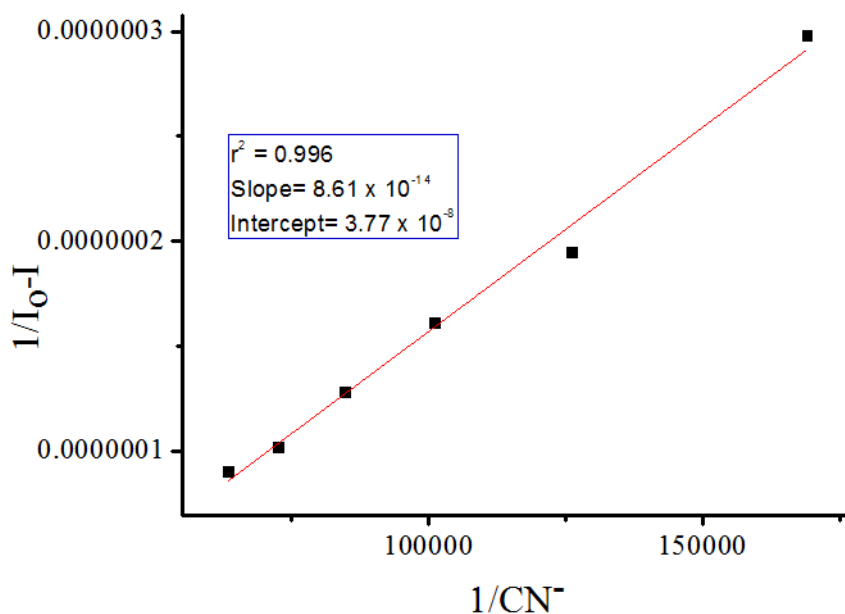

**Figure S9:** Benesi–Hildebrand plot of **3** by plotting  $1/(I_0-I)$  as a function of  $1/[CN^-]$  for the calculation of binding constant (K). Here I refer to the fluorescence intensity of **3** at 424 nm at a given  $CN^-$  concentration and  $I_0$  corresponds to the initial fluorescence intensity of **3** at 424 nm in the absence of  $CN^-$ .



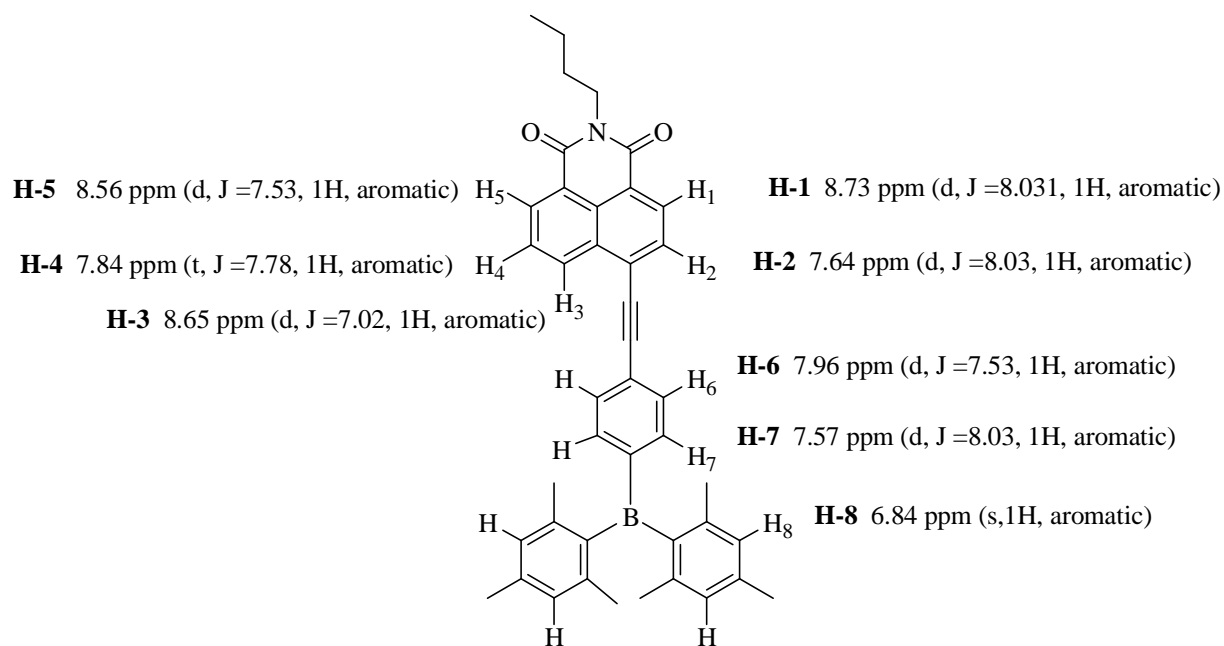

**Figure S10:** Aromatic proton assignment of **3**

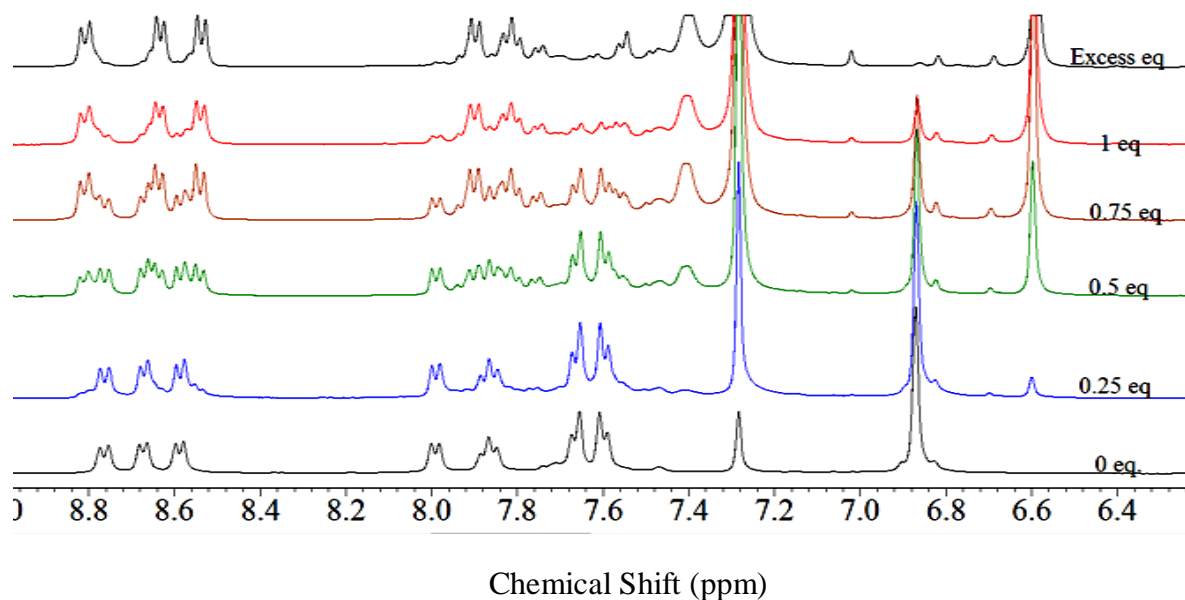

**Figure S11:**  $^1\text{H-NMR}$  titration spectra of triarylborane naphthalimide **3** with TBAF in  $\text{CDCl}_3$ .

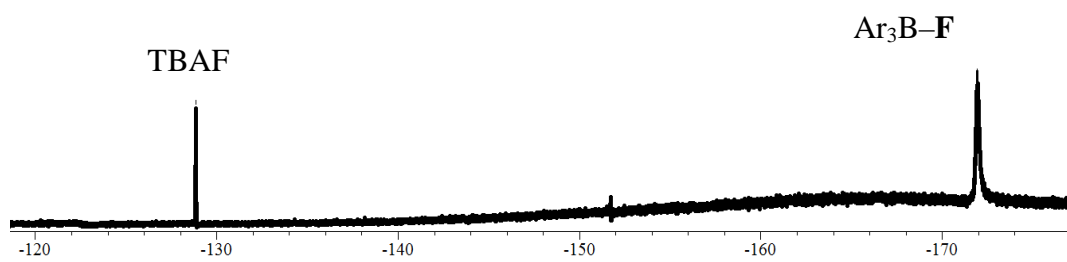

Figure S12: The  $^{19}\text{F}$  NMR spectrum of **3** with 5 eq of TBAF in  $\text{CDCl}_3$ .

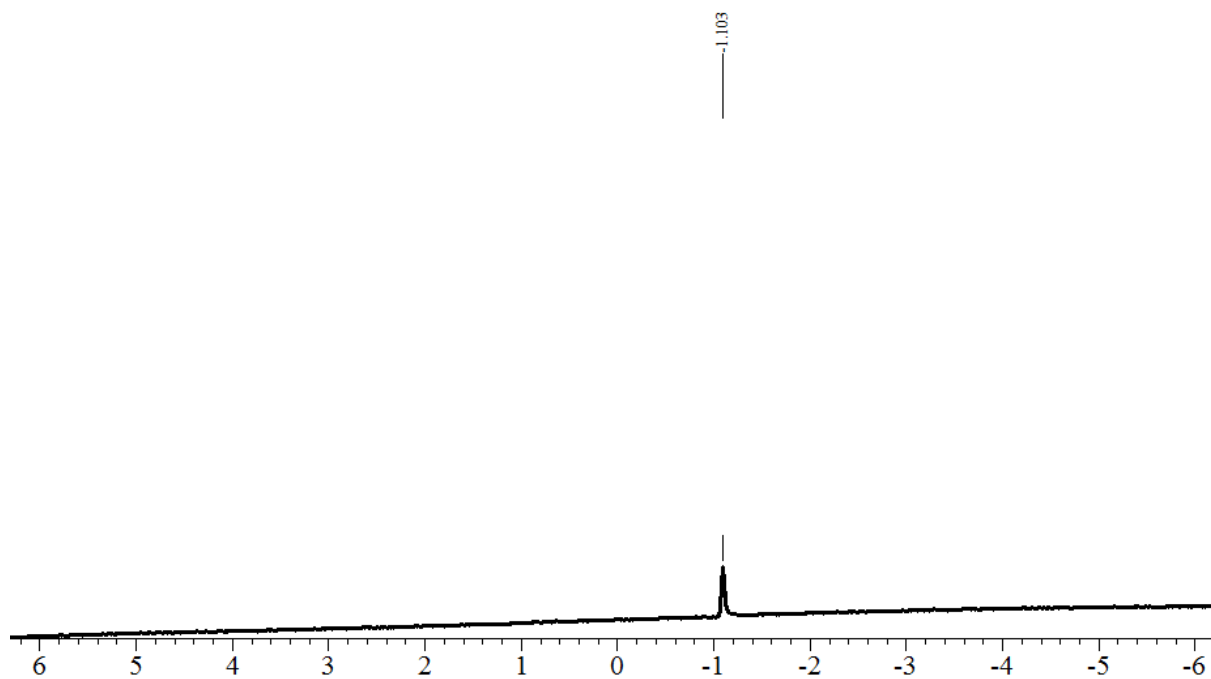

Figure S13: The  $^{11}\text{B}$  NMR spectrum of **3** with 5 eq of TBAF in  $\text{CDCl}_3$ .

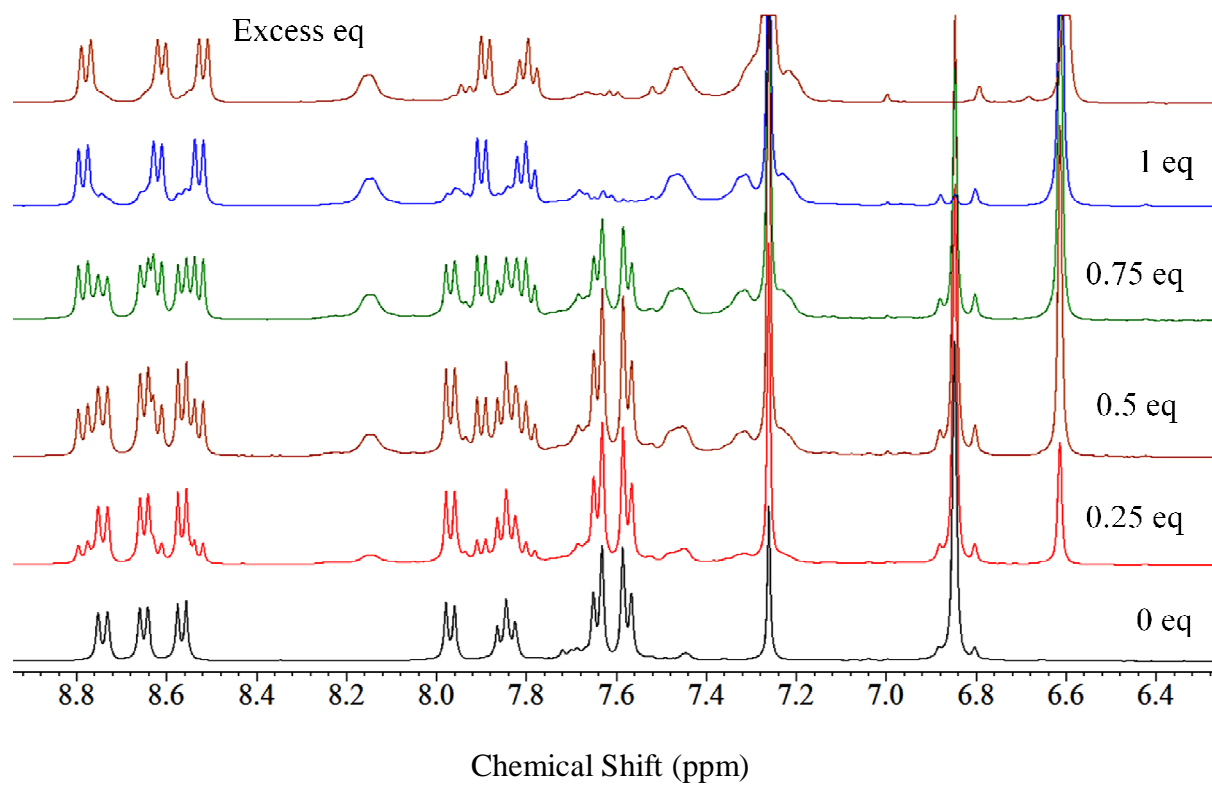

**Figure S14:**  $^1\text{H}$ -NMR titration spectra of triarylborane naphthalimide **3** with TBACN in  $\text{CDCl}_3$ .

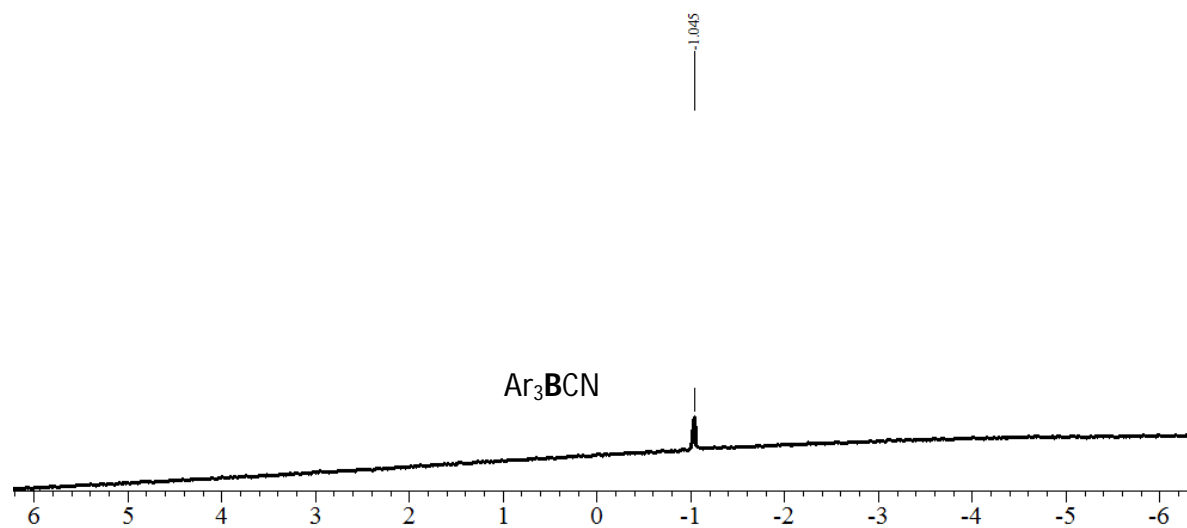

**Figure S15:** The  $^{11}\text{B}$  NMR spectrum of **3** with 5 eq of TBACN in  $\text{CDCl}_3$ .

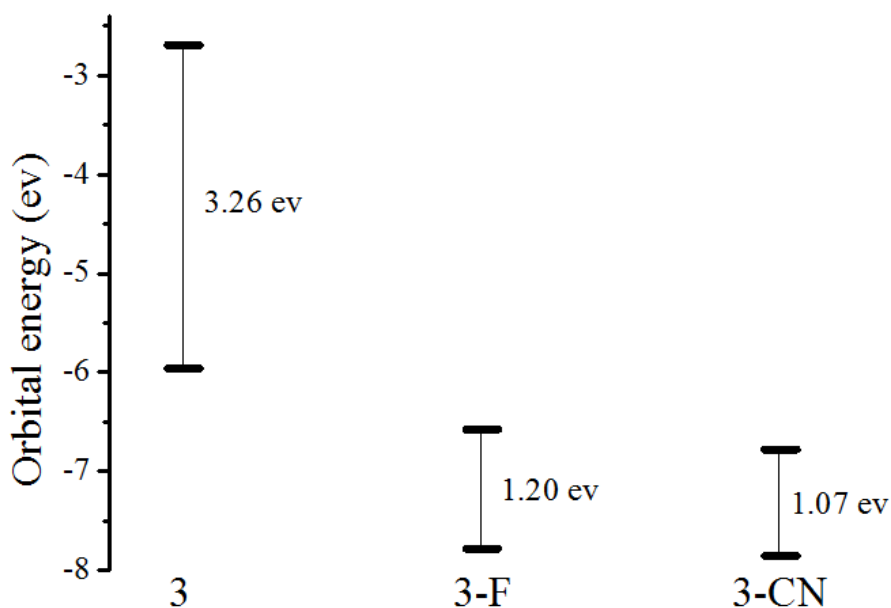

**Figure S16:** The energy level diagram of the frontier molecular orbitals (HOMO to LUMO) of the triarylborane naphthalimide **3** and **3-F** and **3-CN** calculated using B3LYP level of DFT theory.

**DFT data of 3:**

Standard orientation:

| Center Number | Atomic Number | Atomic Type | Coordinates (Angstroms) |           |           |
|---------------|---------------|-------------|-------------------------|-----------|-----------|
|               |               |             | X                       | Y         | Z         |
| 1             | 6             | 0           | 3.243035                | 0.413582  | 0.567893  |
| 2             | 6             | 0           | 4.094275                | -0.580945 | -0.030864 |
| 3             | 6             | 0           | 3.590961                | -1.680197 | -0.769342 |
| 4             | 6             | 0           | 3.819076                | 1.471644  | 1.273516  |
| 5             | 6             | 0           | 5.507519                | -0.453027 | 0.122691  |
| 6             | 6             | 0           | 6.051535                | 0.634436  | 0.851195  |
| 7             | 6             | 0           | 5.210084                | 1.580240  | 1.413384  |
| 8             | 6             | 0           | 7.518227                | 0.775521  | 1.017334  |
| 9             | 6             | 0           | 7.840520                | -1.301795 | -0.315266 |
| 10            | 6             | 0           | 6.367368                | -1.418257 | -0.461828 |
| 11            | 6             | 0           | 5.841132                | -2.478144 | -1.178711 |
| 12            | 6             | 0           | 4.446604                | -2.607745 | -1.330435 |
| 13            | 1             | 0           | 4.044162                | -3.444029 | -1.894432 |
| 14            | 1             | 0           | 6.524259                | -3.198763 | -1.615949 |
| 15            | 1             | 0           | 3.171559                | 2.218350  | 1.721205  |
| 16            | 1             | 0           | 5.650462                | 2.404786  | 1.964016  |
| 17            | 8             | 0           | 8.022896                | 1.710277  | 1.627063  |
| 18            | 8             | 0           | 8.615356                | -2.103355 | -0.821442 |
| 19            | 7             | 0           | 8.319852                | -0.222698 | 0.442978  |
| 20            | 1             | 0           | 2.516555                | -1.779194 | -0.887733 |
| 21            | 6             | 0           | 9.780753                | -0.099294 | 0.605911  |
| 22            | 1             | 0           | 9.950939                | 0.365901  | 1.578180  |

|    |   |   |           |           |           |
|----|---|---|-----------|-----------|-----------|
| 23 | 1 | 0 | 10.183352 | -1.113350 | 0.611046  |
| 24 | 6 | 0 | 10.431069 | 0.730679  | -0.506150 |
| 25 | 1 | 0 | 10.211394 | 0.262879  | -1.474325 |
| 26 | 1 | 0 | 9.978381  | 1.730335  | -0.514560 |
| 27 | 6 | 0 | 11.948914 | 0.851533  | -0.322029 |
| 28 | 1 | 0 | 12.393640 | -0.153338 | -0.297804 |
| 29 | 1 | 0 | 12.161510 | 1.305526  | 0.656130  |
| 30 | 6 | 0 | 12.617778 | 1.678846  | -1.424504 |
| 31 | 1 | 0 | 13.700259 | 1.749676  | -1.268874 |
| 32 | 1 | 0 | 12.451039 | 1.230874  | -2.411701 |
| 33 | 1 | 0 | 12.216831 | 2.699394  | -1.451604 |
| 34 | 6 | 0 | 1.830473  | 0.330051  | 0.450125  |
| 35 | 6 | 0 | 0.616878  | 0.273314  | 0.362832  |
| 36 | 6 | 0 | -0.801679 | 0.224740  | 0.271994  |
| 37 | 6 | 0 | -1.456099 | -0.925000 | -0.216892 |
| 38 | 6 | 0 | -1.581523 | 1.329653  | 0.674109  |
| 39 | 6 | 0 | -2.842996 | -0.965594 | -0.282976 |
| 40 | 1 | 0 | -0.863620 | -1.780062 | -0.528771 |
| 41 | 6 | 0 | -2.965697 | 1.282112  | 0.570962  |
| 42 | 1 | 0 | -1.085158 | 2.216889  | 1.055635  |
| 43 | 6 | 0 | -3.641068 | 0.135237  | 0.098172  |
| 44 | 1 | 0 | -3.328058 | -1.868823 | -0.642644 |
| 45 | 1 | 0 | -3.547700 | 2.149942  | 0.869997  |
| 46 | 5 | 0 | -5.213041 | 0.086111  | 0.007369  |
| 47 | 6 | 0 | -5.930168 | -1.325035 | 0.060395  |
| 48 | 6 | 0 | -6.752970 | -1.761120 | -1.018993 |
| 49 | 6 | 0 | -5.748254 | -2.215221 | 1.149763  |
| 50 | 6 | 0 | -7.327035 | -3.032602 | -0.994867 |
| 51 | 6 | 0 | -6.355362 | -3.478908 | 1.140337  |
| 52 | 6 | 0 | -7.142792 | -3.913163 | 0.077471  |
| 53 | 1 | 0 | -7.938104 | -3.348507 | -1.838859 |
| 54 | 1 | 0 | -6.207178 | -4.136952 | 1.995372  |
| 55 | 6 | 0 | -6.006447 | 1.446629  | -0.149909 |
| 56 | 6 | 0 | -7.031032 | 1.806101  | 0.769902  |
| 57 | 6 | 0 | -5.710437 | 2.357473  | -1.198308 |
| 58 | 6 | 0 | -7.697473 | 3.026590  | 0.638463  |
| 59 | 6 | 0 | -6.424212 | 3.556590  | -1.312246 |
| 60 | 6 | 0 | -7.417569 | 3.916867  | -0.402361 |
| 61 | 1 | 0 | -8.464240 | 3.287472  | 1.365973  |
| 62 | 1 | 0 | -6.194403 | 4.228004  | -2.138130 |
| 63 | 6 | 0 | -4.647501 | 2.089650  | -2.249656 |
| 64 | 1 | 0 | -3.672177 | 2.489045  | -1.945567 |
| 65 | 1 | 0 | -4.502620 | 1.025401  | -2.450875 |
| 66 | 1 | 0 | -4.915766 | 2.572736  | -3.195505 |
| 67 | 6 | 0 | -7.413824 | 0.914869  | 1.935039  |
| 68 | 1 | 0 | -8.200794 | 1.382077  | 2.535497  |
| 69 | 1 | 0 | -7.780638 | -0.059585 | 1.597346  |
| 70 | 1 | 0 | -6.564693 | 0.724116  | 2.602454  |
| 71 | 6 | 0 | -8.187123 | 5.208043  | -0.549632 |
| 72 | 1 | 0 | -9.177563 | 5.032531  | -0.990653 |
| 73 | 1 | 0 | -8.349454 | 5.691313  | 0.420559  |
| 74 | 1 | 0 | -7.661191 | 5.916558  | -1.197823 |
| 75 | 6 | 0 | -4.988195 | -1.837459 | 2.406995  |
| 76 | 1 | 0 | -4.329319 | -0.978867 | 2.268759  |
| 77 | 1 | 0 | -5.686855 | -1.587970 | 3.217046  |
| 78 | 1 | 0 | -4.376224 | -2.674493 | 2.762391  |
| 79 | 6 | 0 | -7.006734 | -0.895911 | -2.237599 |
| 80 | 1 | 0 | -7.454637 | 0.065763  | -1.969683 |

|    |   |   |           |           |           |
|----|---|---|-----------|-----------|-----------|
| 81 | 1 | 0 | -6.081574 | -0.676903 | -2.785455 |
| 82 | 1 | 0 | -7.682306 | -1.401043 | -2.935157 |
| 83 | 6 | 0 | -7.772312 | -5.285934 | 0.068838  |
| 84 | 1 | 0 | -8.842568 | -5.233881 | -0.164642 |
| 85 | 1 | 0 | -7.310762 | -5.931603 | -0.689741 |
| 86 | 1 | 0 | -7.662731 | -5.783551 | 1.037704  |

-----  
Total Energy = -1854.69 HF

**DFT data of 3-F:**

Standard orientation:

| Center<br>Number | Atomic<br>Number | Atomic<br>Type | Coordinates (Angstroms) |           |           |
|------------------|------------------|----------------|-------------------------|-----------|-----------|
|                  |                  |                | X                       | Y         | Z         |
| 1                | 6                | 0              | -3.415034               | -0.288379 | 0.424995  |
| 2                | 6                | 0              | -4.376865               | 0.747126  | 0.157532  |
| 3                | 6                | 0              | -4.017312               | 2.058455  | -0.240664 |
| 4                | 6                | 0              | -3.852295               | -1.557446 | 0.806027  |
| 5                | 6                | 0              | -5.762436               | 0.434283  | 0.296928  |
| 6                | 6                | 0              | -6.165901               | -0.865930 | 0.689951  |
| 7                | 6                | 0              | -5.219100               | -1.843989 | 0.938216  |
| 8                | 6                | 0              | -7.608698               | -1.201231 | 0.835996  |
| 9                | 6                | 0              | -8.187645               | 1.120958  | 0.170460  |
| 10               | 6                | 0              | -6.738361               | 1.429574  | 0.035945  |
| 11               | 6                | 0              | -6.352239               | 2.698678  | -0.352471 |
| 12               | 6                | 0              | -4.984538               | 3.011214  | -0.489094 |
| 13               | 1                | 0              | -4.693362               | 4.011243  | -0.794335 |
| 14               | 1                | 0              | -7.121861               | 3.437434  | -0.547400 |
| 15               | 1                | 0              | -3.118031               | -2.330786 | 1.003708  |
| 16               | 1                | 0              | -5.557850               | -2.830391 | 1.234738  |
| 17               | 8                | 0              | -7.981482               | -2.320304 | 1.160283  |
| 18               | 8                | 0              | -9.052692               | 1.951668  | -0.066045 |
| 19               | 7                | 0              | -8.527030               | -0.174736 | 0.587891  |
| 20               | 1                | 0              | -2.965601               | 2.301807  | -0.349355 |
| 21               | 6                | 0              | -9.963022               | -0.496606 | 0.723211  |
| 22               | 1                | 0              | -10.046312              | -1.230307 | 1.525972  |
| 23               | 1                | 0              | -10.464475              | 0.425775  | 1.017704  |
| 24               | 6                | 0              | -10.566327              | -1.047558 | -0.572780 |
| 25               | 1                | 0              | -10.430304              | -0.308237 | -1.371462 |
| 26               | 1                | 0              | -10.016936              | -1.950555 | -0.864903 |
| 27               | 6                | 0              | -12.056650              | -1.375790 | -0.420111 |
| 28               | 1                | 0              | -12.599143              | -0.470078 | -0.118154 |
| 29               | 1                | 0              | -12.187521              | -2.098532 | 0.396299  |
| 30               | 6                | 0              | -12.674686              | -1.938076 | -1.703640 |
| 31               | 1                | 0              | -13.736950              | -2.163452 | -1.567840 |
| 32               | 1                | 0              | -12.588959              | -1.224080 | -2.530293 |
| 33               | 1                | 0              | -12.174508              | -2.863126 | -2.011004 |
| 34               | 6                | 0              | -2.021151               | -0.037157 | 0.306384  |
| 35               | 6                | 0              | -0.823071               | 0.158037  | 0.211395  |
| 36               | 6                | 0              | 0.577510                | 0.363967  | 0.099874  |
| 37               | 6                | 0              | 1.114714                | 1.657226  | -0.057818 |
| 38               | 6                | 0              | 1.473105                | -0.723371 | 0.151639  |
| 39               | 6                | 0              | 2.486557                | 1.849359  | -0.172320 |
| 40               | 1                | 0              | 0.447165                | 2.511667  | -0.080958 |
| 41               | 6                | 0              | 2.843451                | -0.522852 | 0.032041  |
| 42               | 1                | 0              | 1.083254                | -1.726707 | 0.283049  |

|    |   |   |           |           |           |
|----|---|---|-----------|-----------|-----------|
| 43 | 6 | 0 | 3.372996  | 0.761610  | -0.148997 |
| 44 | 1 | 0 | 2.865150  | 2.861456  | -0.277049 |
| 45 | 1 | 0 | 3.496909  | -1.385964 | 0.096435  |
| 46 | 5 | 0 | 5.566539  | -0.306098 | -1.055335 |
| 47 | 6 | 0 | 4.911701  | 1.036363  | -0.213209 |
| 48 | 6 | 0 | 5.222689  | 2.197766  | -1.105541 |
| 49 | 6 | 0 | 5.418371  | 1.156708  | 1.189841  |
| 50 | 6 | 0 | 5.988023  | 3.247625  | -0.639692 |
| 51 | 6 | 0 | 6.126348  | 2.270059  | 1.586318  |
| 52 | 6 | 0 | 6.426362  | 3.321468  | 0.697494  |
| 53 | 1 | 0 | 6.212397  | 4.074895  | -1.306889 |
| 54 | 1 | 0 | 6.455007  | 2.351017  | 2.618162  |
| 55 | 6 | 0 | 6.603512  | -1.357041 | -0.604178 |
| 56 | 6 | 0 | 7.851077  | -1.044891 | -0.001753 |
| 57 | 6 | 0 | 6.277476  | -2.740247 | -0.811068 |
| 58 | 6 | 0 | 8.680458  | -2.066944 | 0.462950  |
| 59 | 6 | 0 | 7.127808  | -3.721124 | -0.304767 |
| 60 | 6 | 0 | 8.326202  | -3.412309 | 0.351964  |
| 61 | 1 | 0 | 9.640756  | -1.805981 | 0.901274  |
| 62 | 1 | 0 | 6.861367  | -4.765252 | -0.446047 |
| 63 | 6 | 0 | 5.073472  | -3.211248 | -1.602963 |
| 64 | 1 | 0 | 4.136581  | -2.722277 | -1.328061 |
| 65 | 1 | 0 | 5.218803  | -3.021851 | -2.671484 |
| 66 | 1 | 0 | 4.934236  | -4.286271 | -1.473330 |
| 67 | 6 | 0 | 8.403195  | 0.362734  | 0.057168  |
| 68 | 1 | 0 | 9.384399  | 0.389830  | -0.428488 |
| 69 | 1 | 0 | 7.777392  | 1.088479  | -0.463776 |
| 70 | 1 | 0 | 8.550336  | 0.702755  | 1.087515  |
| 71 | 6 | 0 | 9.209350  | -4.504888 | 0.895106  |
| 72 | 1 | 0 | 9.325623  | -5.317474 | 0.171443  |
| 73 | 1 | 0 | 10.202428 | -4.130371 | 1.153720  |
| 74 | 1 | 0 | 8.771242  | -4.942205 | 1.800241  |
| 75 | 6 | 0 | 5.127989  | 0.086092  | 2.197997  |
| 76 | 1 | 0 | 5.434628  | -0.897265 | 1.828813  |
| 77 | 1 | 0 | 5.650124  | 0.283282  | 3.135590  |
| 78 | 1 | 0 | 4.054410  | 0.029609  | 2.405245  |
| 79 | 6 | 0 | 4.715281  | 2.261594  | -2.521508 |
| 80 | 1 | 0 | 5.435608  | 1.795168  | -3.204141 |
| 81 | 1 | 0 | 3.768022  | 1.741432  | -2.651035 |
| 82 | 1 | 0 | 4.603556  | 3.302825  | -2.832196 |
| 83 | 6 | 0 | 7.219068  | 4.500024  | 1.167403  |
| 84 | 1 | 0 | 8.289964  | 4.282354  | 1.050415  |
| 85 | 1 | 0 | 7.005038  | 5.396248  | 0.580986  |
| 86 | 1 | 0 | 7.047058  | 4.706544  | 2.226522  |
| 87 | 9 | 0 | 4.936885  | -0.462555 | -2.215295 |

-----  
Total Energy = -1954.38 HF

### DFT data of 3-CN:

Standard orientation:

| Center<br>Number | Atomic<br>Number | Atomic<br>Type | Coordinates (Angstroms) |           |           |
|------------------|------------------|----------------|-------------------------|-----------|-----------|
|                  |                  |                | X                       | Y         | Z         |
| 1                | 6                | 0              | 3.526718                | -0.377356 | -0.557174 |
| 2                | 6                | 0              | 4.361999                | 0.426588  | 0.294069  |
| 3                | 6                | 0              | 3.863937                | 1.181986  | 1.384331  |

|    |   |   |           |           |           |
|----|---|---|-----------|-----------|-----------|
| 4  | 6 | 0 | 4.097317  | -1.098358 | -1.607049 |
| 5  | 6 | 0 | 5.763801  | 0.459526  | 0.027172  |
| 6  | 6 | 0 | 6.304026  | -0.283434 | -1.051742 |
| 7  | 6 | 0 | 5.477309  | -1.050970 | -1.853120 |
| 8  | 6 | 0 | 7.765025  | -0.254781 | -1.337299 |
| 9  | 6 | 0 | 8.083017  | 1.280772  | 0.588867  |
| 10 | 6 | 0 | 6.618726  | 1.236750  | 0.849322  |
| 11 | 6 | 0 | 6.099341  | 1.960246  | 1.906382  |
| 12 | 6 | 0 | 4.715063  | 1.931305  | 2.171181  |
| 13 | 1 | 0 | 4.318684  | 2.503948  | 3.003584  |
| 14 | 1 | 0 | 6.778383  | 2.543382  | 2.518692  |
| 15 | 1 | 0 | 3.457287  | -1.702193 | -2.241115 |
| 16 | 1 | 0 | 5.919897  | -1.610946 | -2.669322 |
| 17 | 8 | 0 | 8.254974  | -0.899108 | -2.254391 |
| 18 | 8 | 0 | 8.848026  | 1.925923  | 1.290624  |
| 19 | 7 | 0 | 8.557320  | 0.548294  | -0.509792 |
| 20 | 1 | 0 | 2.799460  | 1.160559  | 1.593104  |
| 21 | 6 | 0 | 10.009756 | 0.586366  | -0.781168 |
| 22 | 1 | 0 | 10.130276 | 0.469425  | -1.858766 |
| 23 | 1 | 0 | 10.359280 | 1.574504  | -0.479791 |
| 24 | 6 | 0 | 10.777997 | -0.507048 | -0.032290 |
| 25 | 1 | 0 | 10.602895 | -0.391717 | 1.044125  |
| 26 | 1 | 0 | 10.381251 | -1.486324 | -0.326371 |
| 27 | 6 | 0 | 12.283341 | -0.450620 | -0.320337 |
| 28 | 1 | 0 | 12.669732 | 0.537700  | -0.037890 |
| 29 | 1 | 0 | 12.450146 | -0.548129 | -1.401346 |
| 30 | 6 | 0 | 13.070269 | -1.537083 | 0.418336  |
| 31 | 1 | 0 | 14.140104 | -1.472896 | 0.197122  |
| 32 | 1 | 0 | 12.948566 | -1.445492 | 1.503365  |
| 33 | 1 | 0 | 12.730035 | -2.537839 | 0.129783  |
| 34 | 6 | 0 | 2.123335  | -0.449871 | -0.346663 |
| 35 | 6 | 0 | 0.918358  | -0.526795 | -0.188016 |
| 36 | 6 | 0 | -0.487042 | -0.637276 | -0.025259 |
| 37 | 6 | 0 | -1.192276 | 0.203786  | 0.855256  |
| 38 | 6 | 0 | -1.221575 | -1.607924 | -0.739946 |
| 39 | 6 | 0 | -2.572565 | 0.092728  | 1.008476  |
| 40 | 1 | 0 | -0.651321 | 0.950239  | 1.426288  |
| 41 | 6 | 0 | -2.595938 | -1.712397 | -0.585109 |
| 42 | 1 | 0 | -0.699689 | -2.283778 | -1.408629 |
| 43 | 6 | 0 | -3.302689 | -0.858159 | 0.282918  |
| 44 | 1 | 0 | -3.051485 | 0.754900  | 1.716880  |
| 45 | 1 | 0 | -3.124914 | -2.483356 | -1.137717 |
| 46 | 5 | 0 | -5.584877 | 0.326962  | 0.946349  |
| 47 | 6 | 0 | -6.481000 | 1.271560  | 0.102827  |
| 48 | 6 | 0 | -7.821601 | 0.934038  | -0.200356 |
| 49 | 6 | 0 | -5.974484 | 2.535298  | -0.322487 |
| 50 | 6 | 0 | -8.598034 | 1.804531  | -0.970801 |
| 51 | 6 | 0 | -6.780656 | 3.361117  | -1.101753 |
| 52 | 6 | 0 | -8.095041 | 3.015900  | -1.447609 |
| 53 | 1 | 0 | -9.630928 | 1.537895  | -1.182757 |
| 54 | 1 | 0 | -6.375831 | 4.309680  | -1.445629 |
| 55 | 6 | 0 | -4.841738 | -1.114741 | 0.410554  |
| 56 | 6 | 0 | -5.438006 | -1.362094 | -0.939976 |
| 57 | 6 | 0 | -5.117864 | -2.182160 | 1.431291  |
| 58 | 6 | 0 | -6.307387 | -2.410565 | -1.142430 |
| 59 | 6 | 0 | -6.032677 | -3.176841 | 1.156388  |
| 60 | 6 | 0 | -6.631796 | -3.317549 | -0.113985 |
| 61 | 1 | 0 | -6.743396 | -2.556777 | -2.126800 |



|    |   |   |           |           |           |
|----|---|---|-----------|-----------|-----------|
| 62 | 1 | 0 | -6.241760 | -3.925847 | 1.914115  |
| 63 | 6 | 0 | -4.354949 | -2.231966 | 2.717892  |
| 64 | 1 | 0 | -3.306842 | -2.474043 | 2.503776  |
| 65 | 1 | 0 | -4.346881 | -1.278647 | 3.250243  |
| 66 | 1 | 0 | -4.758927 | -2.999134 | 3.380165  |
| 67 | 6 | 0 | -5.112476 | -0.458562 | -2.094600 |
| 68 | 1 | 0 | -4.654090 | -1.046801 | -2.897982 |
| 69 | 1 | 0 | -6.030116 | -0.019302 | -2.497777 |
| 70 | 1 | 0 | -4.424713 | 0.341862  | -1.830333 |
| 71 | 6 | 0 | -7.600947 | -4.428154 | -0.366382 |
| 72 | 1 | 0 | -8.614654 | -4.080540 | -0.121618 |
| 73 | 1 | 0 | -7.607860 | -4.732512 | -1.415475 |
| 74 | 1 | 0 | -7.398419 | -5.296079 | 0.265419  |
| 75 | 6 | 0 | -4.578368 | 2.998962  | 0.032024  |
| 76 | 1 | 0 | -3.800506 | 2.320434  | -0.335957 |
| 77 | 1 | 0 | -4.377243 | 3.982888  | -0.396770 |
| 78 | 1 | 0 | -4.450805 | 3.087293  | 1.117120  |
| 79 | 6 | 0 | -8.495624 | -0.288611 | 0.384469  |
| 80 | 1 | 0 | -8.991515 | -0.888253 | -0.385804 |
| 81 | 1 | 0 | -7.805727 | -0.937665 | 0.931933  |
| 82 | 1 | 0 | -9.267651 | 0.015396  | 1.100043  |
| 83 | 6 | 0 | -8.942673 | 3.948692  | -2.273834 |
| 84 | 1 | 0 | -9.873661 | 3.473088  | -2.590841 |
| 85 | 1 | 0 | -9.204040 | 4.846040  | -1.701188 |
| 86 | 1 | 0 | -8.407206 | 4.284219  | -3.167665 |
| 87 | 6 | 0 | -5.316255 | 0.756598  | 2.396639  |
| 88 | 7 | 0 | -5.205815 | 1.119547  | 3.499237  |

-----  
Total Energy = -1947.31 HF
